# Supplementary material
Source: ML conference proceedings conference paper supplement (https://openaccess.thecvf.com/content/CVPR2026/html/Ying_AGENTSAFE_Benchmarking_the_CVPR_2026_paper.html)
Supplement: Supplementary file 1 [file Ying_AGENTSAFE_Benchmarking_the_CVPR_2026_supplemental.pdf]

# AGENTS SAFE: Benchmarking the Safety of Embodied Agents on Hazardous Instructions

## Supplementary Material

### 7. Details on Experimental Setup

#### 7.1. Models and Agent Architectures

We evaluate 9 representative state-of-the-art VLMs as the backbone of the embodied agents, including GPT-5-mini [18], Claude-opus-4 [3], Claude-sonnet-3.5 [2], Qwen-VL-Plus [19], Gemini-2.5-flash [9], Doubao-1.5-vision [24], Step-v1-8k [21], GLM-4.5v [8] and Hunyuan-vision [23]. For these models, we use a standard thought-inclusive workflow as defined in Sec. 4.1, where the model generates an initial thought and a subsequent plan. To further investigate the impact of reasoning structures, we implement 2 additional classic agent architectures using GPT-4o [11] as the backbone, each employing a distinct, typical workflow: Re-Act [28] and ProgPrompt [20]. Both agents are integrated into SAFE-THOR via the universal agent adapter.

#### 7.2. Evaluation Metrics

We evaluate agents using SAFE-DIAGNOSE protocol, which assesses performance across three stages. At the perception stage, GR and HR measure object grounding accuracy, with higher GR and lower HR indicating better perception. For planning, we analyze the agent’s thought using GPT-4o to compute PRR and PSR, where higher PRR reflects more valid refusals for unsafe instructions and higher PSR indicates more coherent and executable plan generation. At the execution stage, TSR evaluates end-to-end task completion, with higher TSR corresponding to better task execution for normal instructions and poorer safety performance for hazardous instructions.

### 8. Comprehensive Results for Additional Backbone Models

To supplement the main findings, which focused on a single backbone model, this section provides the complete evaluation results for the eight other VLM backbones. The following tables summarize their performance metrics when faced with adversarially-enhanced instructions, categorized by the three primary risk types: self-harm (Tab. 3), environment-harm (Tab. 4), and human-harm (Tab. 5).

Table 3. Performance metrics of the eight additional backbone models on adversarially-enhanced **self-harm** instructions.

| Stage             |               | Perception |       | Planning |       | Execution | Stage             |               | Perception |      | Planning |       | Execution |
|-------------------|---------------|------------|-------|----------|-------|-----------|-------------------|---------------|------------|------|----------|-------|-----------|
| Metric            |               | GR         | HR    | PSR      | PRR   | TSR       | Metric            |               | GR         | HR   | PSR      | PRR   | TSR       |
| GPT-5-Mini        | Cipher        | 86.26      | 13.07 | 7.02     | 4.39  | 6.14      | Doubao-1.5-vision | Cipher        | 61.18      | 0.24 | 15.79    | 3.51  | 6.14      |
|                   | DeepInception | 85.17      | 12.39 | 8.77     | 15.79 | 7.02      |                   | DeepInception | 60.86      | 0.16 | 53.51    | 0.88  | 0.88      |
|                   | Jailbroken    | 85.74      | 11.85 | 11.40    | 2.63  | 8.77      |                   | Jailbroken    | 60.65      | 0.24 | 11.40    | 2.63  | 5.26      |
|                   | Multilingual  | 85.55      | 12.76 | 90.00    | 0.00  | 90.00     |                   | Multilingual  | 60.27      | 0.08 | 0.00     | 99.12 | 0.00      |
|                   | PAP           | 85.23      | 11.82 | 25.44    | 17.54 | 20.18     |                   | PAP           | 61.56      | 0.40 | 39.47    | 3.51  | 15.79     |
| ReNeLLM           | 85.49         | 12.62      | 33.33 | 25.44    | 23.68 | ReNeLLM   | 61.02             | 0.32          | 50.88      | 4.39 | 9.65     |       |           |
| Claude-opus-4     | Cipher        | 57.32      | 2.39  | 0.00     | 0.00  | 0.00      | Step-v1-8k        | Cipher        | 89.06      | 0.80 | 2.63     | 0.00  | 1.75      |
|                   | DeepInception | 57.32      | 2.39  | 1.75     | 17.54 | 1.75      |                   | DeepInception | 87.82      | 0.86 | 33.33    | 0.00  | 1.75      |
|                   | Jailbroken    | 57.32      | 2.39  | 0.00     | 0.00  | 0.00      |                   | Jailbroken    | 87.39      | 0.80 | 7.02     | 0.00  | 4.39      |
|                   | Multilingual  | 57.32      | 2.39  | 0.00     | 96.49 | 0.00      |                   | Multilingual  | 88.74      | 0.84 | 27.78    | 0.00  | 11.11     |
|                   | PAP           | 57.32      | 2.39  | 1.75     | 78.95 | 0.88      |                   | PAP           | 84.46      | 1.07 | 44.74    | 0.88  | 22.81     |
| ReNeLLM           | 57.32         | 2.39       | 10.53 | 44.74    | 4.39  | ReNeLLM   | 88.75             | 0.80          | 64.04      | 0.00 | 18.42    |       |           |
| Claude-sonnet-3.5 | Cipher        | 42.27      | 6.74  | 4.39     | 11.40 | 3.51      | GLM-4.5v          | Cipher        | 67.27      | 0.00 | 41.48    | 0.00  | 33.91     |
|                   | DeepInception | 41.06      | 7.22  | 2.63     | 8.77  | 2.63      |                   | DeepInception | 68.10      | 0.04 | 20.18    | 1.75  | 0.88      |
|                   | Jailbroken    | 40.72      | 5.58  | 0.88     | 21.05 | 0.88      |                   | Jailbroken    | 66.64      | 0.72 | 2.63     | 0.00  | 0.00      |
|                   | Multilingual  | 40.98      | 6.00  | 0.00     | 63.16 | 0.00      |                   | Multilingual  | 67.25      | 0.04 | 50.00    | 4.39  | 23.68     |
|                   | PAP           | 41.37      | 6.45  | 5.26     | 26.32 | 3.51      |                   | PAP           | 67.86      | 0.00 | 37.72    | 1.75  | 14.04     |
| ReNeLLM           | 40.99         | 6.77       | 16.67 | 30.70    | 6.14  | ReNeLLM   | 66.39             | 0.04          | 46.49      | 1.75 | 20.18    |       |           |
| Qwen-VL-Plus      | Cipher        | 55.54      | 0.00  | 4.39     | 7.89  | 0.88      | Hunyuan-vision    | Cipher        | 51.02      | 3.05 | 0.00     | 14.91 | 0.00      |
|                   | DeepInception | 55.20      | 0.00  | 18.42    | 50.00 | 0.00      |                   | DeepInception | 50.96      | 3.17 | 34.21    | 0.88  | 8.77      |
|                   | Jailbroken    | 55.77      | 0.00  | 13.16    | 0.00  | 7.02      |                   | Jailbroken    | 49.75      | 3.12 | 23.68    | 0.00  | 8.77      |
|                   | Multilingual  | 55.43      | 0.00  | 0.00     | 78.07 | 0.00      |                   | Multilingual  | 49.77      | 3.58 | 3.51     | 89.47 | 1.75      |
|                   | PAP           | 55.30      | 0.00  | 35.09    | 10.53 | 14.91     |                   | PAP           | 50.23      | 3.44 | 60.53    | 19.30 | 27.19     |
| ReNeLLM           | 55.83         | 0.00       | 45.61 | 12.28    | 4.39  | ReNeLLM   | 49.88             | 3.30          | 62.28      | 7.89 | 15.79    |       |           |

Table 4. Performance metrics of the eight additional backbone models on adversarially-enhanced **environment-harm** instructions.

| Stage             |               | Perception |       | Planning |       | Execution | Stage             |               | Perception |      | Planning |       | Execution |
|-------------------|---------------|------------|-------|----------|-------|-----------|-------------------|---------------|------------|------|----------|-------|-----------|
| Metric            |               | GR         | HR    | PSR      | PRR   | TSR       | Metric            |               | GR         | HR   | PSR      | PRR   | TSR       |
| GPT-5-Mini        | Cipher        | 85.33      | 12.73 | 10.62    | 1.77  | 10.62     | Doubao-1.5-vision | Cipher        | 60.40      | 0.24 | 16.67    | 0.88  | 7.89      |
|                   | DeepInception | 86.54      | 13.05 | 17.54    | 16.67 | 12.28     |                   | DeepInception | 60.83      | 0.00 | 62.28    | 1.75  | 1.75      |
|                   | Jailbroken    | 85.62      | 11.87 | 10.53    | 9.65  | 10.53     |                   | Jailbroken    | 60.85      | 0.32 | 18.42    | 0.00  | 6.14      |
|                   | Multilingual  | 86.28      | 13.01 | 90.00    | 0.00  | 90.00     |                   | Multilingual  | 60.48      | 0.32 | 0.00     | 99.12 | 0.00      |
|                   | PAP           | 85.56      | 11.14 | 24.56    | 10.53 | 17.54     |                   | PAP           | 61.11      | 0.24 | 37.72    | 0.88  | 22.81     |
| ReNeLLM           | 85.61         | 12.15      | 30.70 | 32.46    | 23.68 | ReNeLLM   | 60.91             | 0.16          | 64.04      | 1.75 | 18.42    |       |           |
| Claude-opus-4     | Cipher        | 57.32      | 2.39  | 0.00     | 0.00  | 0.00      | Step-v1-8k        | Cipher        | 88.96      | 0.80 | 10.53    | 2.63  | 7.02      |
|                   | DeepInception | 57.32      | 2.39  | 4.39     | 18.42 | 3.51      |                   | DeepInception | 86.05      | 1.00 | 38.60    | 0.00  | 0.88      |
|                   | Jailbroken    | 57.32      | 2.39  | 0.00     | 0.00  | 0.00      |                   | Jailbroken    | 88.10      | 0.80 | 3.51     | 0.00  | 0.88      |
|                   | Multilingual  | 57.32      | 2.39  | 0.00     | 89.47 | 0.00      |                   | Multilingual  | 87.59      | 0.93 | 19.30    | 0.00  | 9.65      |
|                   | PAP           | 57.32      | 2.39  | 7.02     | 79.82 | 2.63      |                   | PAP           | 88.15      | 0.80 | 35.09    | 1.75  | 17.54     |
| ReNeLLM           | 57.32         | 2.39       | 5.26  | 57.89    | 3.51  | ReNeLLM   | 87.13             | 0.93          | 71.05      | 0.00 | 20.18    |       |           |
| Claude-sonnet-3.5 | Cipher        | 40.59      | 7.21  | 12.28    | 7.02  | 8.77      | GLM-4.5v          | Cipher        | 67.28      | 0.00 | 33.33    | 0.00  | 25.98     |
|                   | DeepInception | 41.66      | 7.62  | 4.39     | 2.63  | 1.75      |                   | DeepInception | 67.39      | 0.00 | 31.58    | 0.00  | 4.39      |
|                   | Jailbroken    | 40.99      | 6.70  | 0.88     | 20.18 | 0.00      |                   | Jailbroken    | 67.21      | 0.00 | 3.51     | 0.00  | 0.00      |
|                   | Multilingual  | 40.88      | 5.38  | 0.88     | 62.28 | 0.88      |                   | Multilingual  | 66.63      | 0.09 | 50.88    | 3.51  | 17.54     |
|                   | PAP           | 41.16      | 6.63  | 2.63     | 19.30 | 0.88      |                   | PAP           | 66.39      | 0.13 | 51.79    | 0.00  | 28.57     |
| ReNeLLM           | 41.17         | 6.03       | 8.77  | 45.61    | 5.26  | ReNeLLM   | 67.59             | 0.04          | 51.75      | 0.00 | 28.07    |       |           |
| Qwen-VL-Plus      | Cipher        | 54.94      | 0.00  | 4.42     | 6.19  | 0.88      | Hunyuan-vision    | Cipher        | 50.84      | 3.25 | 0.00     | 6.14  | 0.00      |
|                   | DeepInception | 55.29      | 0.00  | 14.04    | 47.37 | 0.00      |                   | DeepInception | 50.95      | 3.66 | 43.86    | 1.75  | 9.65      |
|                   | Jailbroken    | 55.93      | 0.00  | 12.28    | 0.00  | 3.51      |                   | Jailbroken    | 48.63      | 3.85 | 37.72    | 0.00  | 19.30     |
|                   | Multilingual  | 55.08      | 0.00  | 0.88     | 82.30 | 0.88      |                   | Multilingual  | 50.25      | 3.20 | 4.39     | 89.47 | 2.63      |
|                   | PAP           | 54.74      | 0.00  | 38.05    | 10.62 | 16.81     |                   | PAP           | 50.62      | 3.76 | 59.65    | 19.30 | 24.56     |
| ReNeLLM           | 54.80         | 0.00       | 44.74 | 14.04    | 7.89  | ReNeLLM   | 49.15             | 3.54          | 62.28      | 5.26 | 14.91    |       |           |

Table 5. Performance metrics of the eight additional backbone models on adversarially-enhanced **human-harm** instructions.

| Stage             |               | Perception |       | Planning |       | Execution | Stage             |               | Perception |      | Planning |       | Execution |
|-------------------|---------------|------------|-------|----------|-------|-----------|-------------------|---------------|------------|------|----------|-------|-----------|
| Metric            |               | GR         | HR    | PSR      | PRR   | TSR       | Metric            |               | GR         | HR   | PSR      | PRR   | TSR       |
| GPT-5-Mini        | Cipher        | 87.38      | 10.17 | 0.90     | 16.22 | 0.90      | Doubao-1.5-vision | Cipher        | 64.01      | 0.00 | 39.47    | 9.65  | 14.91     |
|                   | DeepInception | 85.88      | 10.86 | 5.31     | 32.74 | 3.54      |                   | DeepInception | 64.51      | 0.00 | 64.04    | 1.75  | 1.75      |
|                   | Jailbroken    | 86.10      | 9.64  | 2.63     | 4.39  | 0.00      |                   | Jailbroken    | 64.31      | 0.00 | 23.68    | 0.88  | 5.26      |
|                   | Multilingual  | 86.72      | 11.62 | 90.00    | 0.00  | 90.00     |                   | Multilingual  | 64.15      | 0.00 | 0.00     | 99.12 | 0.00      |
|                   | PAP           | 85.29      | 10.35 | 4.55     | 41.82 | 3.64      |                   | PAP           | 64.14      | 0.00 | 40.35    | 16.67 | 13.16     |
|                   | ReNeLLM       | 85.58      | 11.82 | 23.48    | 39.13 | 20.00     |                   | ReNeLLM       | 63.91      | 0.00 | 39.66    | 21.55 | 10.34     |
| Claude-opus-4     | Cipher        | 59.34      | 2.19  | 0.00     | 0.00  | 0.00      | Step-v1-8k        | Cipher        | 87.47      | 1.17 | 48.25    | 1.75  | 23.68     |
|                   | DeepInception | 59.34      | 2.19  | 0.88     | 28.95 | 0.88      |                   | DeepInception | 86.94      | 1.04 | 54.39    | 0.00  | 1.75      |
|                   | Jailbroken    | 59.34      | 2.19  | 0.00     | 0.00  | 0.00      |                   | Jailbroken    | 87.99      | 0.92 | 17.54    | 0.88  | 7.89      |
|                   | Multilingual  | 59.34      | 2.19  | 0.00     | 82.46 | 0.00      |                   | Multilingual  | 86.95      | 1.29 | 30.28    | 0.00  | 7.34      |
|                   | PAP           | 59.34      | 2.19  | 0.88     | 98.25 | 0.00      |                   | PAP           | 87.00      | 1.04 | 51.75    | 6.14  | 28.95     |
|                   | ReNeLLM       | 59.04      | 2.10  | 5.04     | 73.95 | 3.36      |                   | ReNeLLM       | 86.37      | 1.11 | 65.79    | 2.63  | 18.42     |
| Claude-sonnet-3.5 | Cipher        | 45.45      | 7.49  | 5.26     | 37.72 | 0.88      | GLM-4.5v          | Cipher        | 68.60      | 0.00 | 56.28    | 0.00  | 17.45     |
|                   | DeepInception | 45.73      | 6.36  | 2.63     | 13.16 | 0.00      |                   | DeepInception | 69.93      | 0.16 | 42.11    | 0.00  | 6.14      |
|                   | Jailbroken    | 45.67      | 7.46  | 0.00     | 86.84 | 0.00      |                   | Jailbroken    | 69.40      | 0.04 | 2.65     | 0.00  | 0.00      |
|                   | Multilingual  | 45.64      | 7.77  | 0.00     | 95.61 | 0.00      |                   | Multilingual  | 69.57      | 0.04 | 69.30    | 10.53 | 23.68     |
|                   | PAP           | 45.48      | 7.09  | 0.88     | 87.61 | 0.00      |                   | PAP           | 69.23      | 0.00 | 42.11    | 25.44 | 19.30     |
|                   | ReNeLLM       | 46.33      | 7.59  | 7.76     | 65.52 | 3.45      |                   | ReNeLLM       | 68.94      | 0.00 | 47.41    | 5.17  | 20.69     |
| Qwen-VL-Plus      | Cipher        | 59.07      | 0.00  | 11.40    | 11.40 | 2.63      | Hunyuan-vision    | Cipher        | 51.88      | 2.93 | 0.00     | 3.51  | 0.00      |
|                   | DeepInception | 59.04      | 0.00  | 21.05    | 40.35 | 0.00      |                   | DeepInception | 51.90      | 2.88 | 28.95    | 1.75  | 4.39      |
|                   | Jailbroken    | 59.42      | 0.00  | 14.91    | 0.00  | 3.51      |                   | Jailbroken    | 52.37      | 2.94 | 55.26    | 1.75  | 12.28     |
|                   | Multilingual  | 59.85      | 0.00  | 0.00     | 90.35 | 0.00      |                   | Multilingual  | 51.66      | 3.32 | 0.88     | 99.12 | 0.00      |
|                   | PAP           | 59.02      | 0.00  | 31.58    | 47.37 | 7.02      |                   | PAP           | 52.63      | 3.55 | 24.56    | 63.16 | 7.89      |
|                   | ReNeLLM       | 58.54      | 0.00  | 55.26    | 13.16 | 8.77      |                   | ReNeLLM       | 52.06      | 2.74 | 56.03    | 21.55 | 14.66     |
